# Supplementary material for: DNA damage signalling as an anti-cancer barrier in gastric intestinal metaplasia
Source: PubMed Central journal article supplement — Gut. 2020 Jan 14;69(10):1738–49. doi: 10.1136/gutjnl-2019-319002 (PMC7497583; doi:10.1136/gutjnl-2019-319002), 2020-01-14
Supplement: gutjnl-2019-319002supp004.pdf [file gutjnl-2019-319002supp004.pdf]

**Supplementary Table 1.** Details on experimental conditions during multiplex qIHC staining

| Antibody                         | Antigen Retrieval                                              | Primary Antibody                        | Secondary Antibody)/ dilution     | Hoechst 33342 | TSA/ dilution   |
|----------------------------------|----------------------------------------------------------------|-----------------------------------------|-----------------------------------|---------------|-----------------|
| Anti-MCM2                        | Steaming at pH.6.0, 20 mins                                    | 1:1000                                  | Anti-Rabbit, 1:1000               | 1:100         | Opal 520, 1:100 |
| Anti- $\gamma$ H2AX              | Microwaving at pH 9.0, 16 mins                                 | 1:1000                                  | Anti-Mouse, 1:1000                | 1:100         | Opal 690, 1:100 |
| Anti-EpCAM, Anti-pan-Cytokeratin | Steaming at pH.6.0, 20 mins and microwaving at pH 6.0, 16 mins | 1:250 (EpCAM), 1:1000 (pan-Cytokeratin) | Anti-Mouse, 1:1000                | 1:100         | Opal 570, 1:100 |
| Anti-CD44v9                      | Steaming at pH 9.0, 20 mins                                    | 1:100                                   | Anti-Rat (Alexa Fluor 488), 1:200 | 1:100         | NA              |

**Supplementary Table 2.** Scoring of Ki67 and MCM2 staining in human gastric samples.

| Sample    | Ki67/MCM2-Tissue (A) | Ki67/MCM2-Tissue (B) | Ki67/MCM2-Tissue (C) |
|-----------|----------------------|----------------------|----------------------|
| Normal    | <10%/<10%            | <10%,<10%            | <1%/<1%              |
| Gastritis | 40%/40%              | 50%/50%              | 30%/20%              |
| IM        | 30%/70%              | 40%/60%              | 15%/5%               |

**Supplementary Table 3.** Patient details for TMA used for MCM2 staining

| Clinicopathological features | Normal     | Inflammation | Intestinal Metaplasia |
|------------------------------|------------|--------------|-----------------------|
|                              | <b>N=6</b> | <b>N=6</b>   | <b>N=6</b>            |
| Age (Mean)                   | 40.5       | 57.7         | 55.5                  |
| Age range                    | 16-56      | 53-69        | 40-74                 |
| Sex                          |            |              |                       |
| Male                         | 5          | 3            | 5                     |
| Female                       | 1          | 3            | 1                     |

**Supplementary Table 4.** Patient details for TMA with IM and IGC cores

| Clinicopathological features | Intestinal Metaplasia | Adenocarcinoma |
|------------------------------|-----------------------|----------------|
|                              | <b>N=26</b>           | <b>N=14</b>    |
| Age (Mean)                   | 58.9                  | 58.1           |
| Age range                    | 32-74                 | 43-68          |
| Sex                          |                       |                |
| Male                         | 23                    | 11             |
| Female                       | 3                     | 3              |

**Supplementary Table 5.** Patient details for TMA used  $\gamma$ H2AX staining

| Clinicopathological features | Normal | Inflammation | Intestinal Metaplasia |
|------------------------------|--------|--------------|-----------------------|
|                              | N=7    | N=8          | N=6                   |
| <b>Age (Mean)</b>            | 37.4   | 58.6         | 55.5                  |
| <b>Age range</b>             | 16-50  | 52-71        | 40-74                 |
| <b>Sex</b>                   |        |              |                       |
| Male                         | 6      | 4            | 5                     |
| Female                       | 1      | 4            | 1                     |

**Supplementary Table 6.** Patient details for GCEP samples used for  $\gamma$ H2AX staining

| Clinicopathological features   | Normal | Gastritis | Intestinal Metaplasia |
|--------------------------------|--------|-----------|-----------------------|
|                                | N=6    | N=7       | N=6                   |
| <b>Acute Inflammation</b>      |        |           |                       |
| Negative                       | 6      | 3         | 3                     |
| Mild/Moderate                  | -      | 3         | 3                     |
| Marked                         | -      | 1         | -                     |
| <b>Chronic Inflammation</b>    |        |           |                       |
| Negative                       | 6      | -         | -                     |
| Moderate                       | -      | -         | 3                     |
| Marked                         | -      | 7         | 3                     |
| <b><i>H. pylori</i> status</b> |        |           |                       |
| Negative                       | 6      | 2         | 5                     |
| Mild/Moderate                  | -      | 3         | 1                     |
| Marked                         | -      | 2         |                       |
| <b>Atrophy</b>                 |        |           |                       |
| Negative                       | 6      | 7         | -                     |
| Mild/Moderate                  | -      | -         | 3                     |
| Marked                         | -      | -         | 1                     |
| Unknown                        | -      | -         | 2                     |
| <b>Smoking</b>                 |        |           |                       |
| Y                              | -      | 1         | 3                     |
| N                              | 6      | 6         | 3                     |
| <b>Alcohol</b>                 |        |           |                       |
| Y                              | -      | 1         | 1                     |
| N                              | 6      | 6         | 5                     |

**Supplementary Table 7.** Patient details for MCM2 and  $\gamma$ H2AX staining of gastric tissues with different extents of inflammation

| <b>Clinicopathological features</b> |            |
|-------------------------------------|------------|
|                                     | <b>N=9</b> |
| <b>Inflammation Score</b>           |            |
| Negative                            | 3          |
| Mild/Moderate                       | 6          |
| Marked                              | -          |
| <b><i>H. pylori</i> status</b>      |            |
| Negative                            | 9          |
| Positive                            | -          |

**Supplementary Table 8.** Patient details for MCM2 and  $\gamma$ H2AX staining of IM samples from GCEP with different extents of genomic instability

| <b>Clinicopathological features</b> | <b>Genome stable</b> | <b>Genome unstable</b> |
|-------------------------------------|----------------------|------------------------|
|                                     | <b>N=8</b>           | <b>N=7</b>             |
| <b>Chronic Inflammation</b>         |                      |                        |
| Negative                            | 1                    | -                      |
| <b>Mild/Moderate</b>                | 7                    | 7                      |
| <b>Marked</b>                       | -                    | -                      |
| <b>Acute Inflammation</b>           |                      |                        |
| <b>Negative</b>                     | 7                    | 6                      |
| <b>Mild/Moderate</b>                | 1                    | 1                      |
| <b>Marked</b>                       | -                    | -                      |
| <b>Atrophy</b>                      |                      |                        |
| <b>Negative</b>                     | 2                    | 1                      |
| <b>Mild/Moderate</b>                | 3                    | 2                      |
| <b>Marked</b>                       | -                    | -                      |
| <b>Unknown</b>                      | 3                    | 4                      |
| <b><i>H. pylori</i> status</b>      |                      |                        |
| <b>Negative</b>                     | 7                    | 7                      |
| <b>Positive (mild)</b>              | 1                    | -                      |
| <b>IM status</b>                    |                      |                        |
| <b>Mild/Moderate</b>                | -                    | 1                      |
| <b>Marked</b>                       | 8                    | 6                      |

**Supplementary Table 9. Correlation analysis between CD44v9 and  $\gamma$ H2AX in IM samples**

|    | Sample ID* | Category        | <i>r</i> | p-value   |
|----|------------|-----------------|----------|-----------|
| 1  | #1         | Genome-stable   | -0.629   | < 0.00001 |
| 2  | #3         | Genome-stable   | -0.476   | < 0.00001 |
| 3  | #6         | Genome-stable   | -0.576   | < 0.00001 |
| 4  | #7         | Genome-stable   | -0.7     | < 0.00001 |
| 5  | #8         | Genome-stable   | -0.658   | < 0.00001 |
| 6  | #9         | Genome-unstable | -0.628   | < 0.00001 |
| 7  | #12        | Genome-unstable | -0.547   | < 0.00001 |
| 8  | #13        | Genome-unstable | -0.653   | < 0.00001 |
| 9  | #14        | Genome-unstable | -0.416   | < 0.00001 |
| 10 | #15        | Genome-unstable | -0.401   | < 0.00001 |

**Supplementary Table 10. An integrated view of alterations observed in the genome-unstable IM lesions subjected to genomic and IHC analysis.**

|   | Sample ID* | % CD44V9+ | Mutation No. | Mutation<br>Mutation in DNA repair genes | CNA segments | Methylation cluster | Hypermethylation<br>Hypermethylation of DNA repair genes |
|---|------------|-----------|--------------|------------------------------------------|--------------|---------------------|----------------------------------------------------------|
| 1 | #9         | 10.79     | 25           | No                                       | 1            | High                | Yes                                                      |
| 2 | #10        | NA**      | 28           | <i>ATM</i>                               | 0            | High                | Yes                                                      |
| 3 | #11        | NA**      | 51           | <i>FANCA, HLTF, REV3L, POLE</i>          | 0            | Intermediate        | No                                                       |
| 4 | #12        | 13.9      | 14           | No                                       | 3            | High                | Yes                                                      |
| 5 | #13        | 1.31      | 28           | No                                       | 0            | NA**                | NA**                                                     |
| 6 | #14        | 34.17     | 38           | No                                       | 1            | High                | Yes                                                      |
| 7 | #15        | 6.33      | 23           | No                                       | 1            | NA**                | NA**                                                     |
