# Supplementary figures and images for: DNA damage signalling as an anti-cancer barrier in gastric intestinal metaplasia
Source: PubMed Central journal article supplement — Gut. 2020 Jan 14;69(10):1738–49. doi: 10.1136/gutjnl-2019-319002 (PMC7497583; doi:10.1136/gutjnl-2019-319002), 2020-01-14

Figure S1

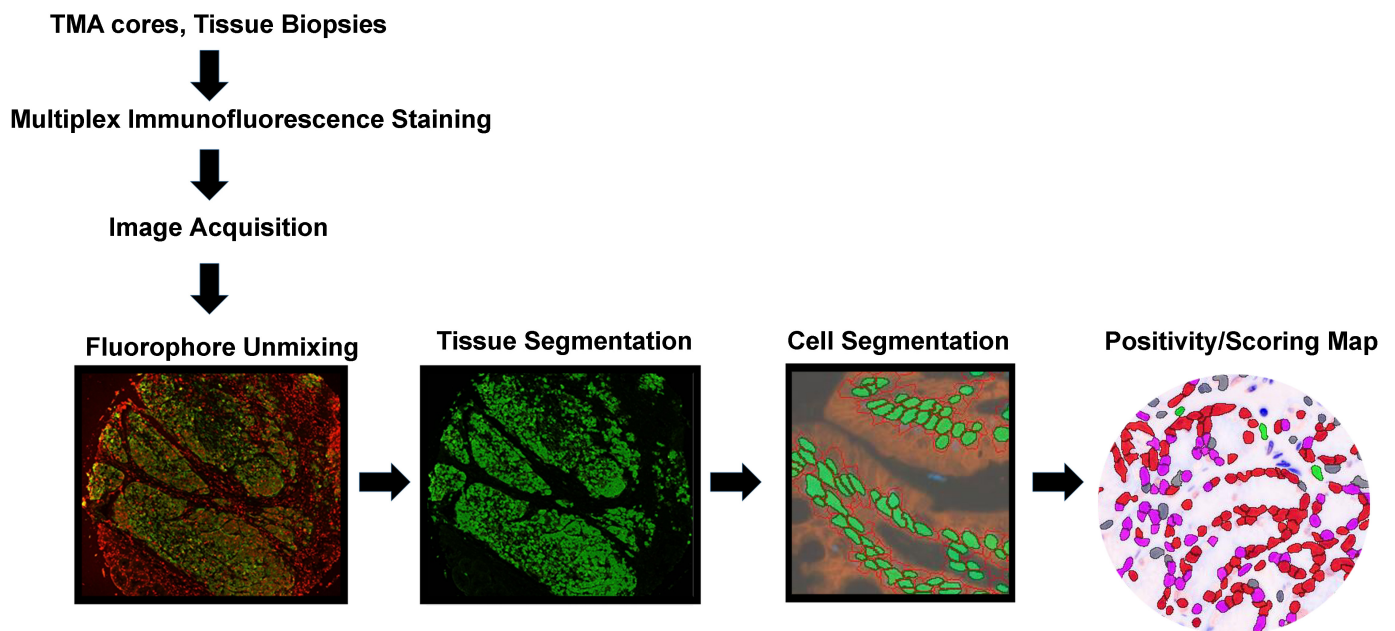

Supplement: gutjnl-2019-319002supp002.pdf [file gutjnl-2019-319002supp002.pdf]

### Supplementary Figure S2

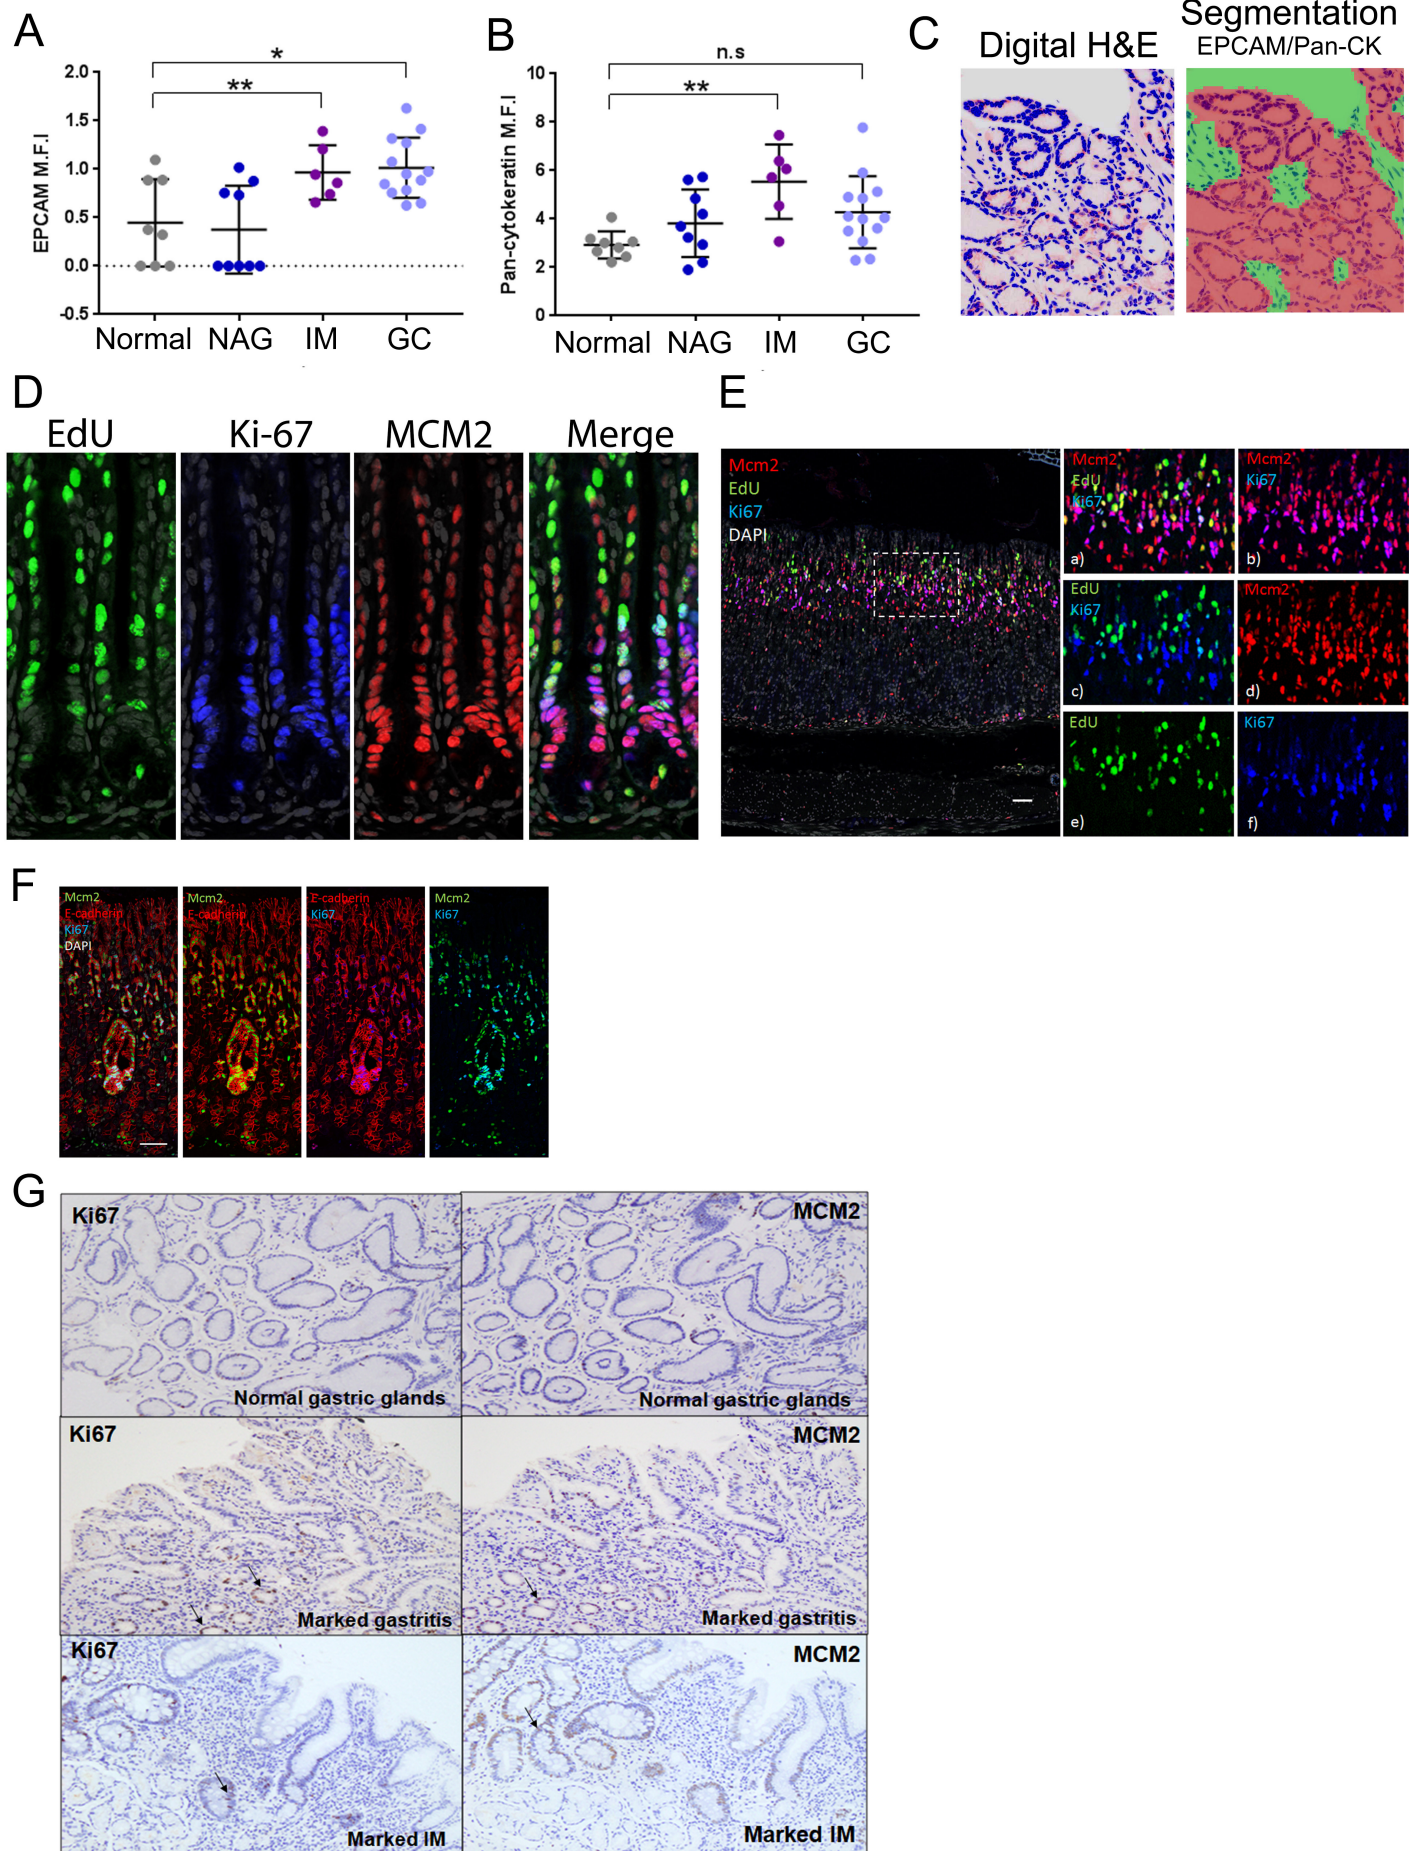

Supplement: gutjnl-2019-319002supp005.pdf [file gutjnl-2019-319002supp005.pdf]

## Supplementary Figure S3

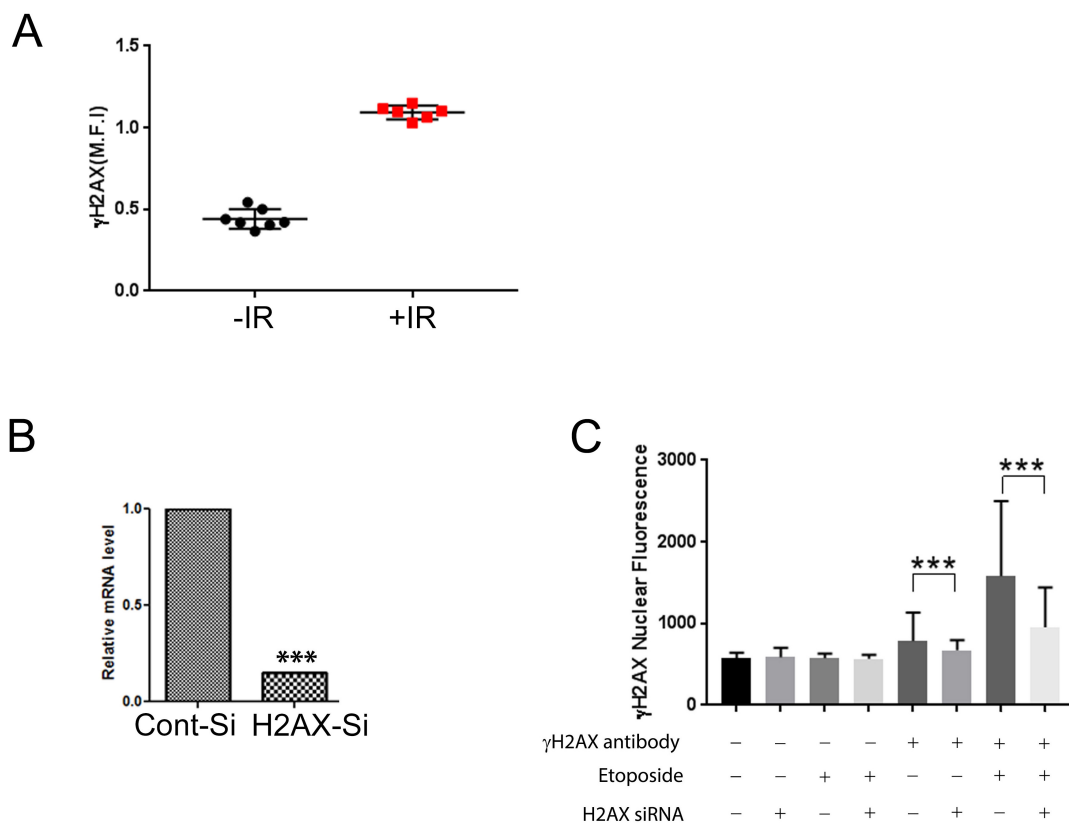

Supplement: gutjnl-2019-319002supp006.pdf [file gutjnl-2019-319002supp006.pdf]

## Supplementary Figure S4

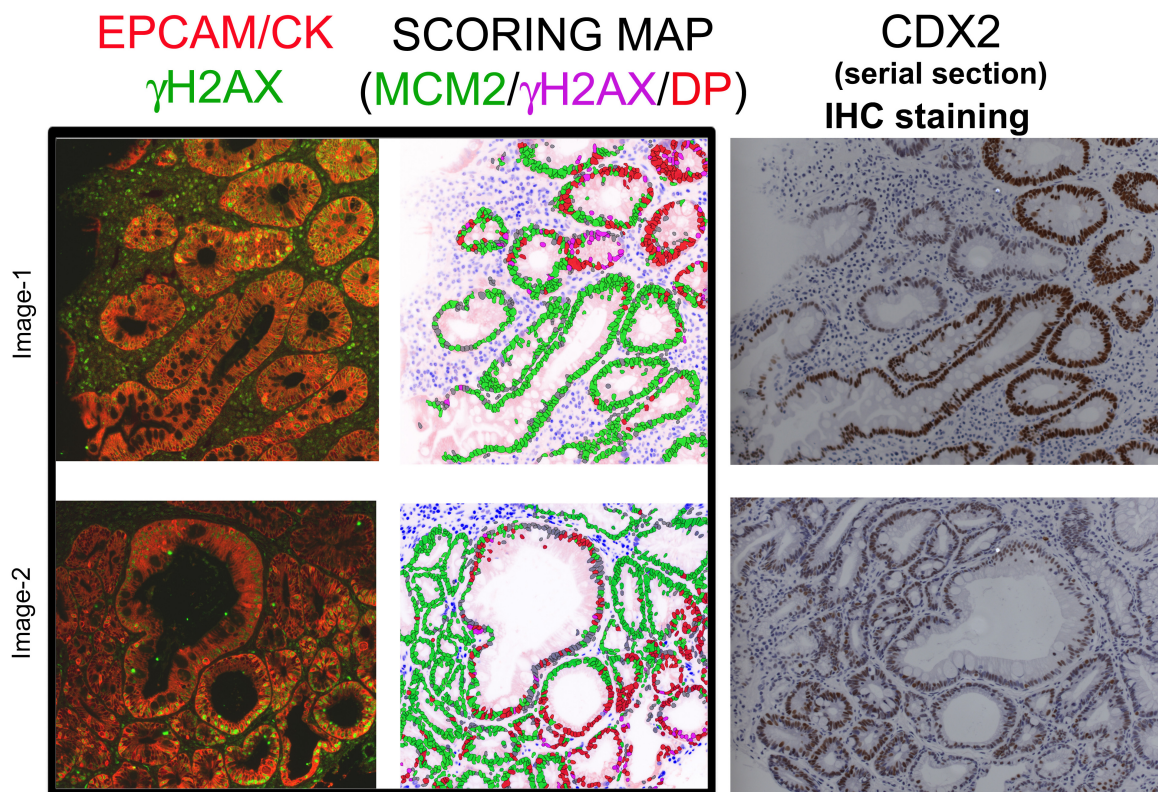

Supplement: gutjnl-2019-319002supp007.pdf [file gutjnl-2019-319002supp007.pdf]

## Supplementary Figure S5

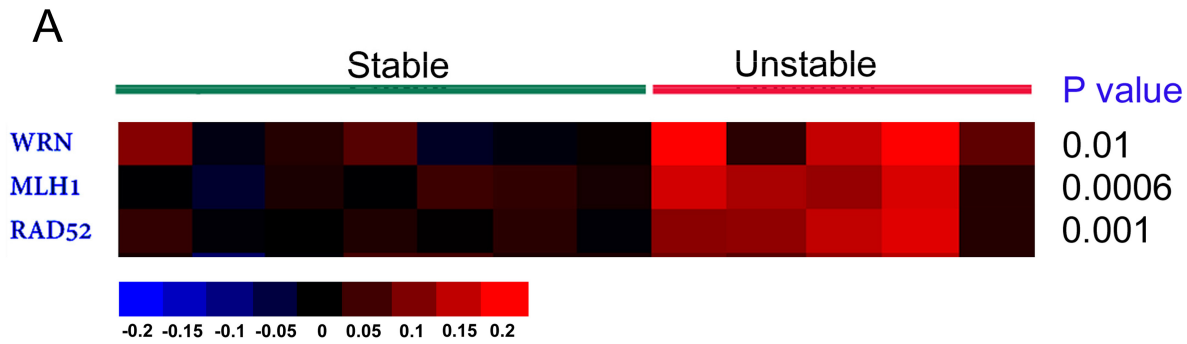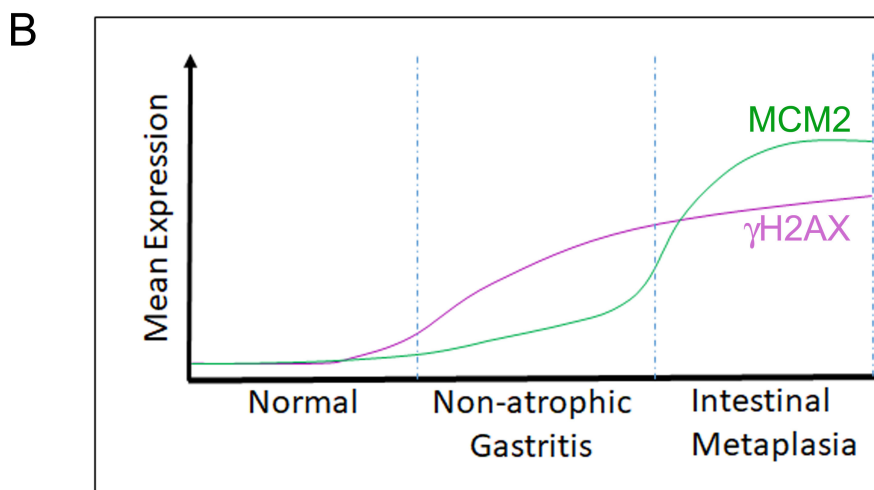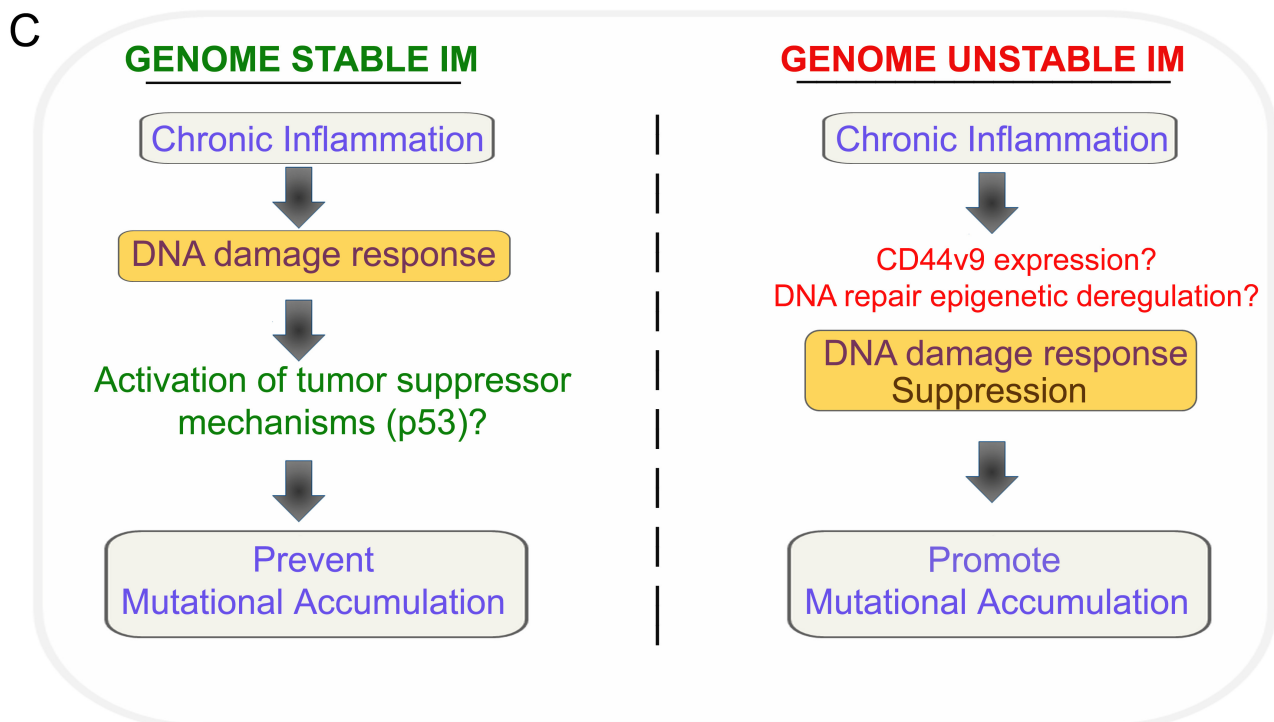

Supplement: gutjnl-2019-319002supp009.pdf [file gutjnl-2019-319002supp009.pdf]
