# Supplementary figures and images for: DNA damage signalling as an anti-cancer barrier in gastric intestinal metaplasia
Source: HighWire-hosted journal article supplement (doi:10.1136/gutjnl-2019-319002), 2020-01-14

Figure S1

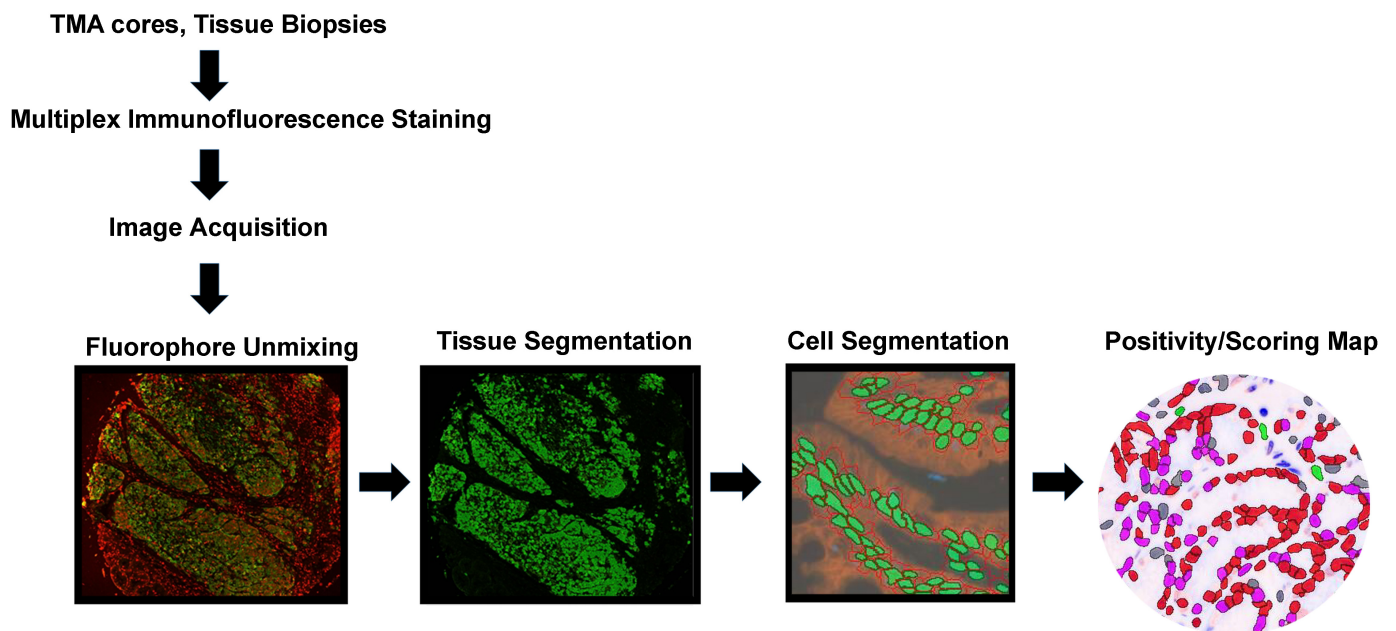

Supplement: gutjnl-2019-319002supp002_data_supplement.pdf [file gutjnl-2019-319002supp002_data_supplement.pdf]

### Supplementary Figure S2

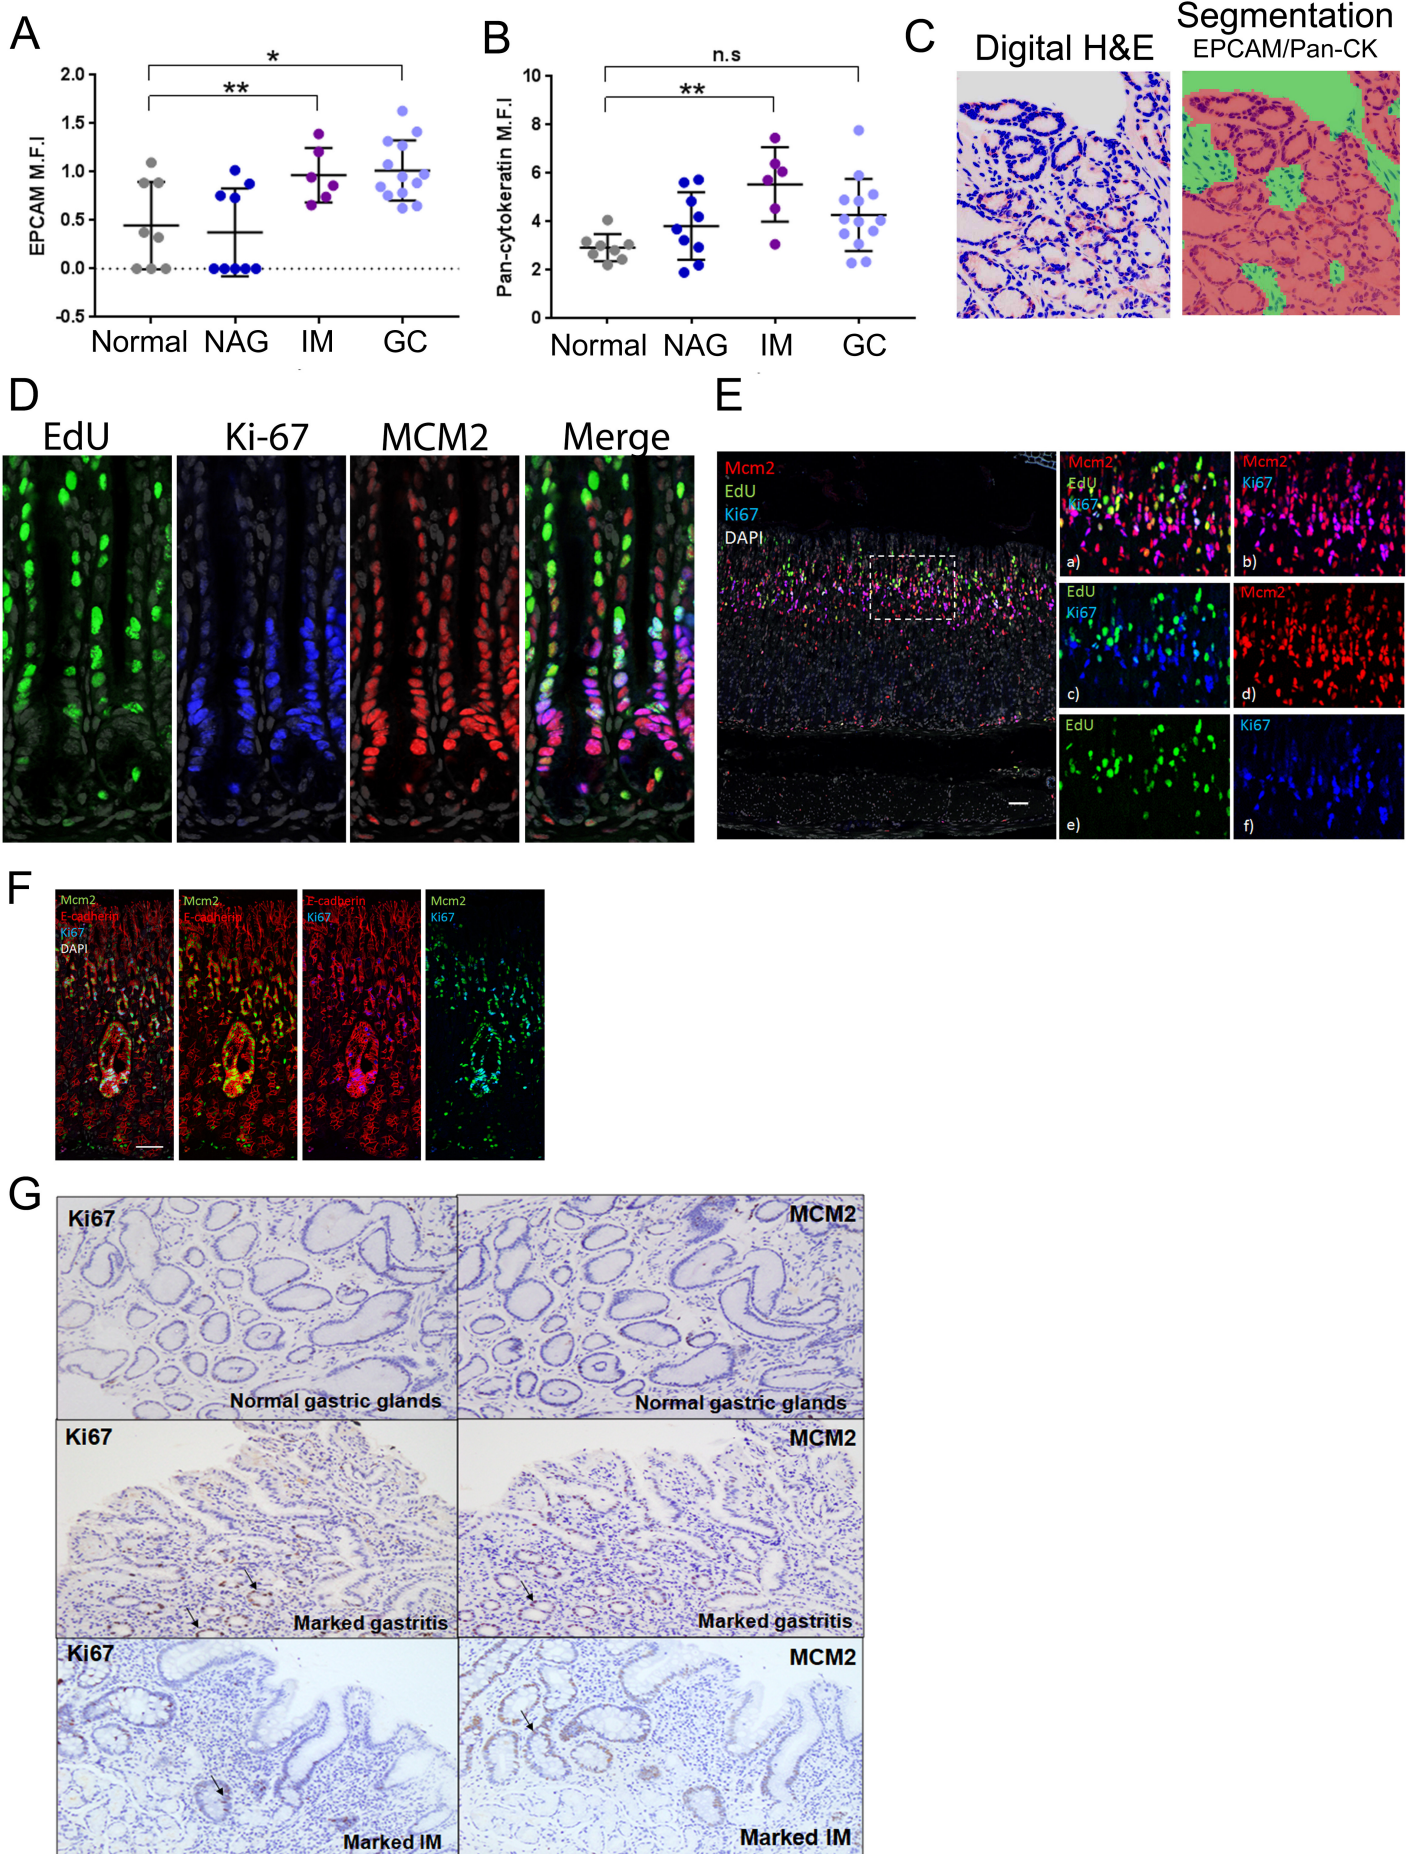

Supplement: gutjnl-2019-319002supp005_data_supplement.pdf [file gutjnl-2019-319002supp005_data_supplement.pdf]

## Supplementary Figure S3

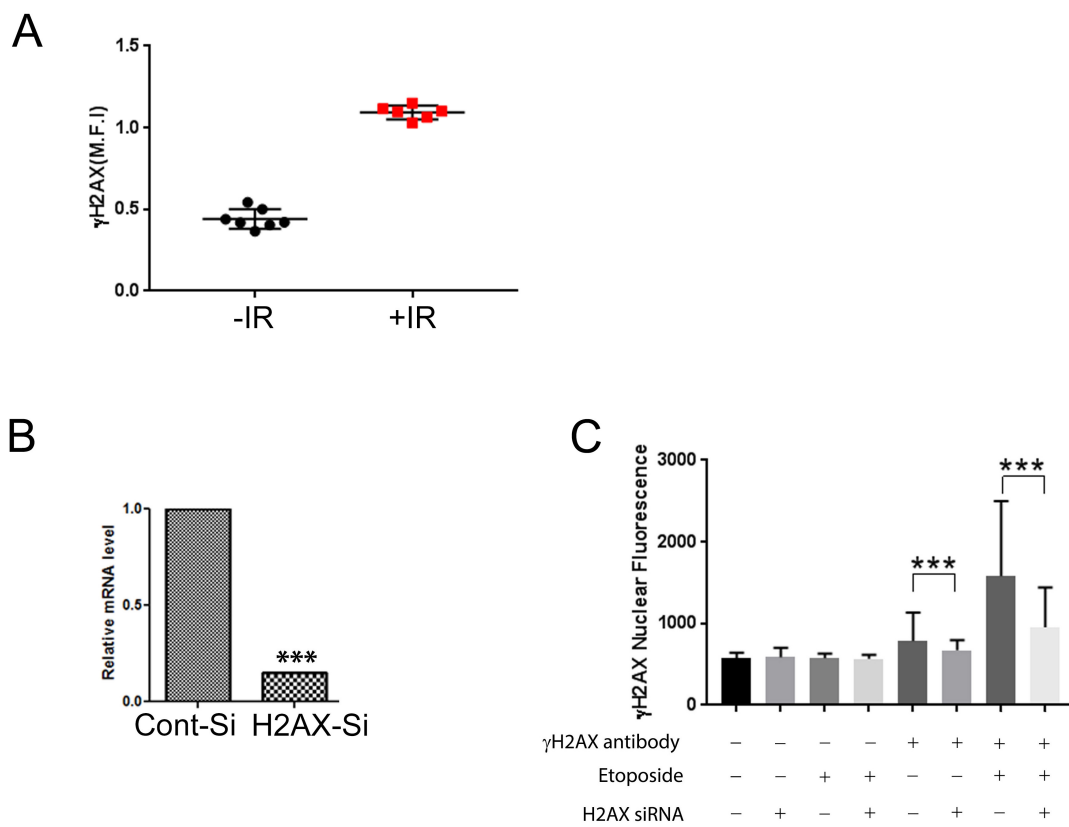

Supplement: gutjnl-2019-319002supp006_data_supplement.pdf [file gutjnl-2019-319002supp006_data_supplement.pdf]

## Supplementary Figure S4

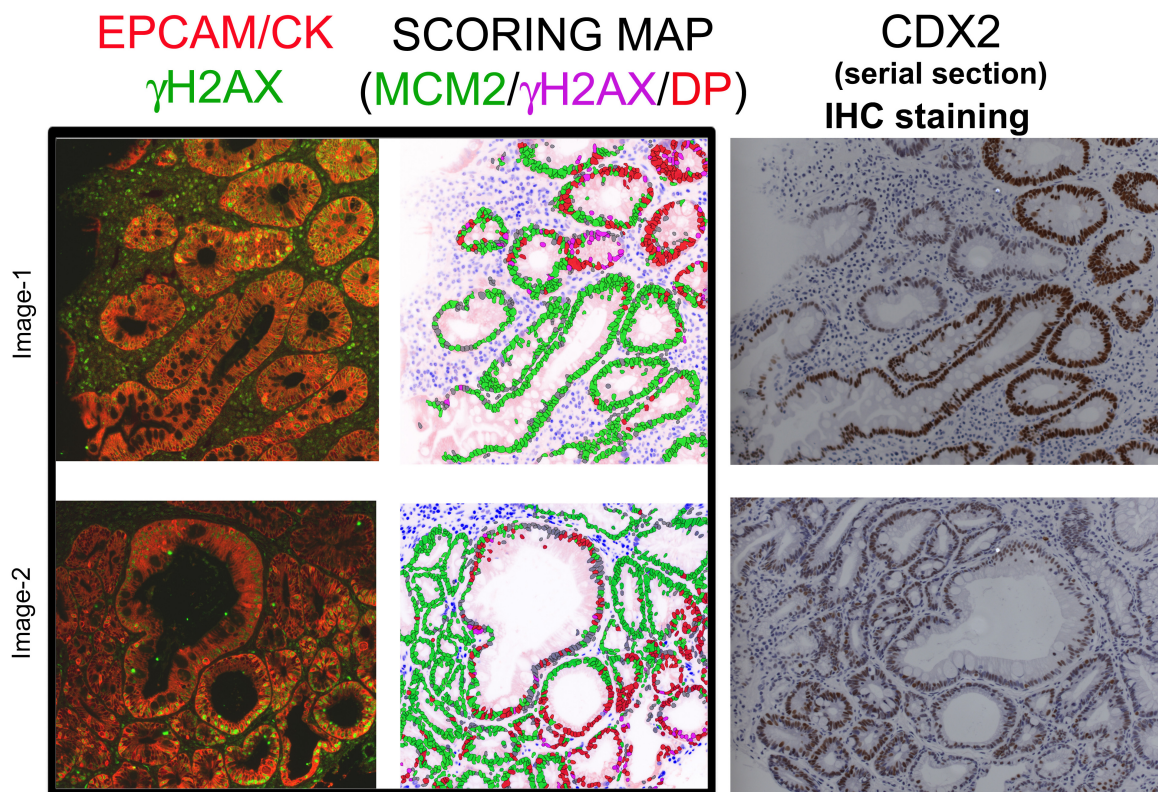

Supplement: gutjnl-2019-319002supp007_data_supplement.pdf [file gutjnl-2019-319002supp007_data_supplement.pdf]

### Supplementary Figure S5

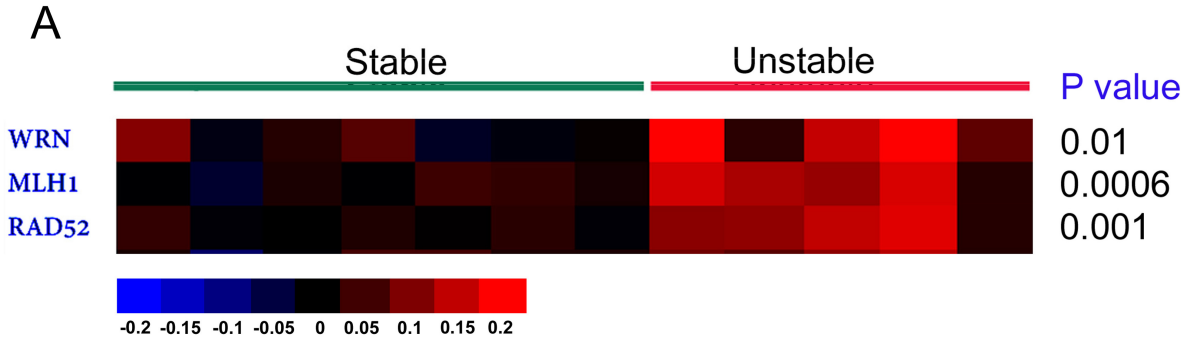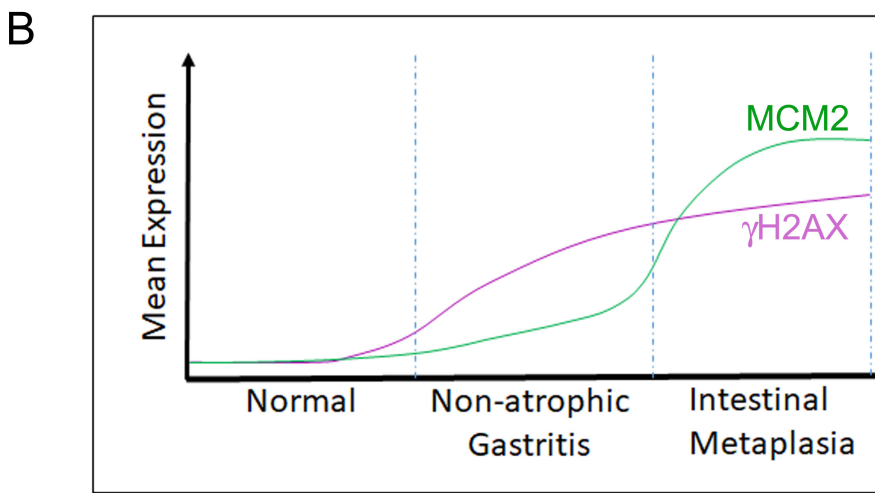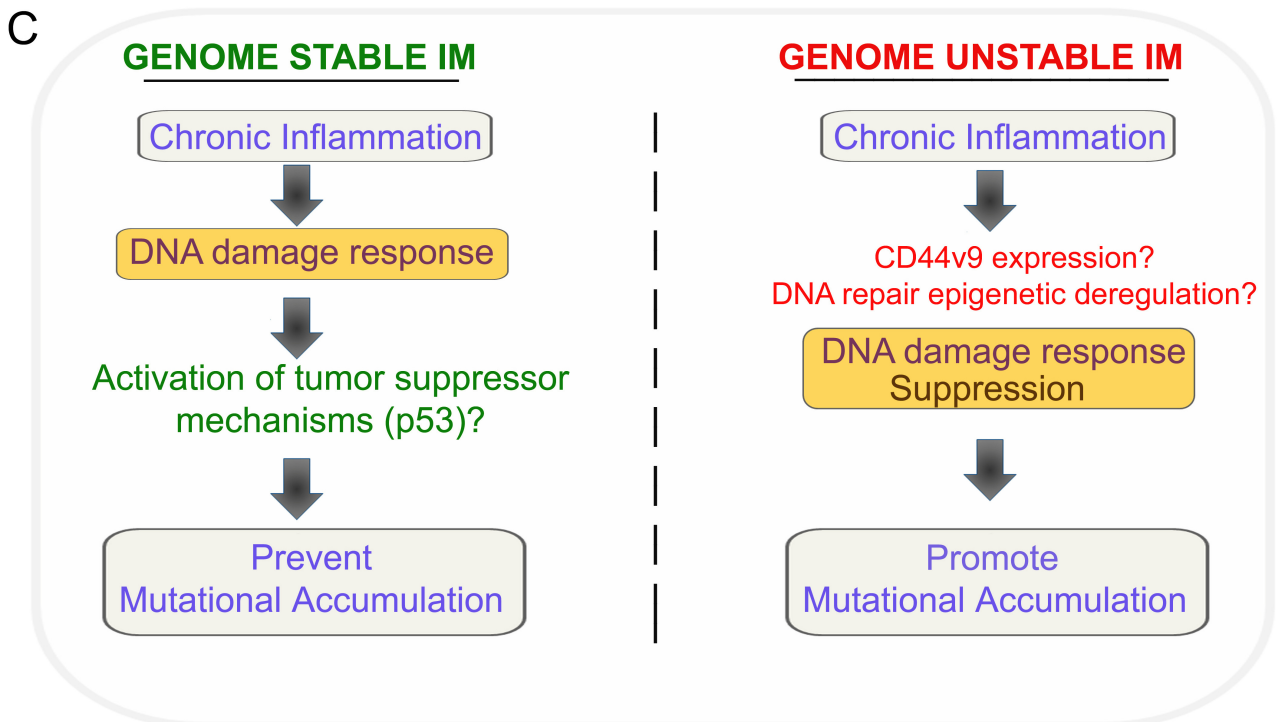

Supplement: gutjnl-2019-319002supp009_data_supplement.pdf [file gutjnl-2019-319002supp009_data_supplement.pdf]
